# Supplementary material
Source: PubMed Central journal article supplement (PMC5101131)
Supplement: NIHMS811964-supplement-1.pdf [file NIHMS811964-supplement-1.pdf]

## Suppl. Figure 1

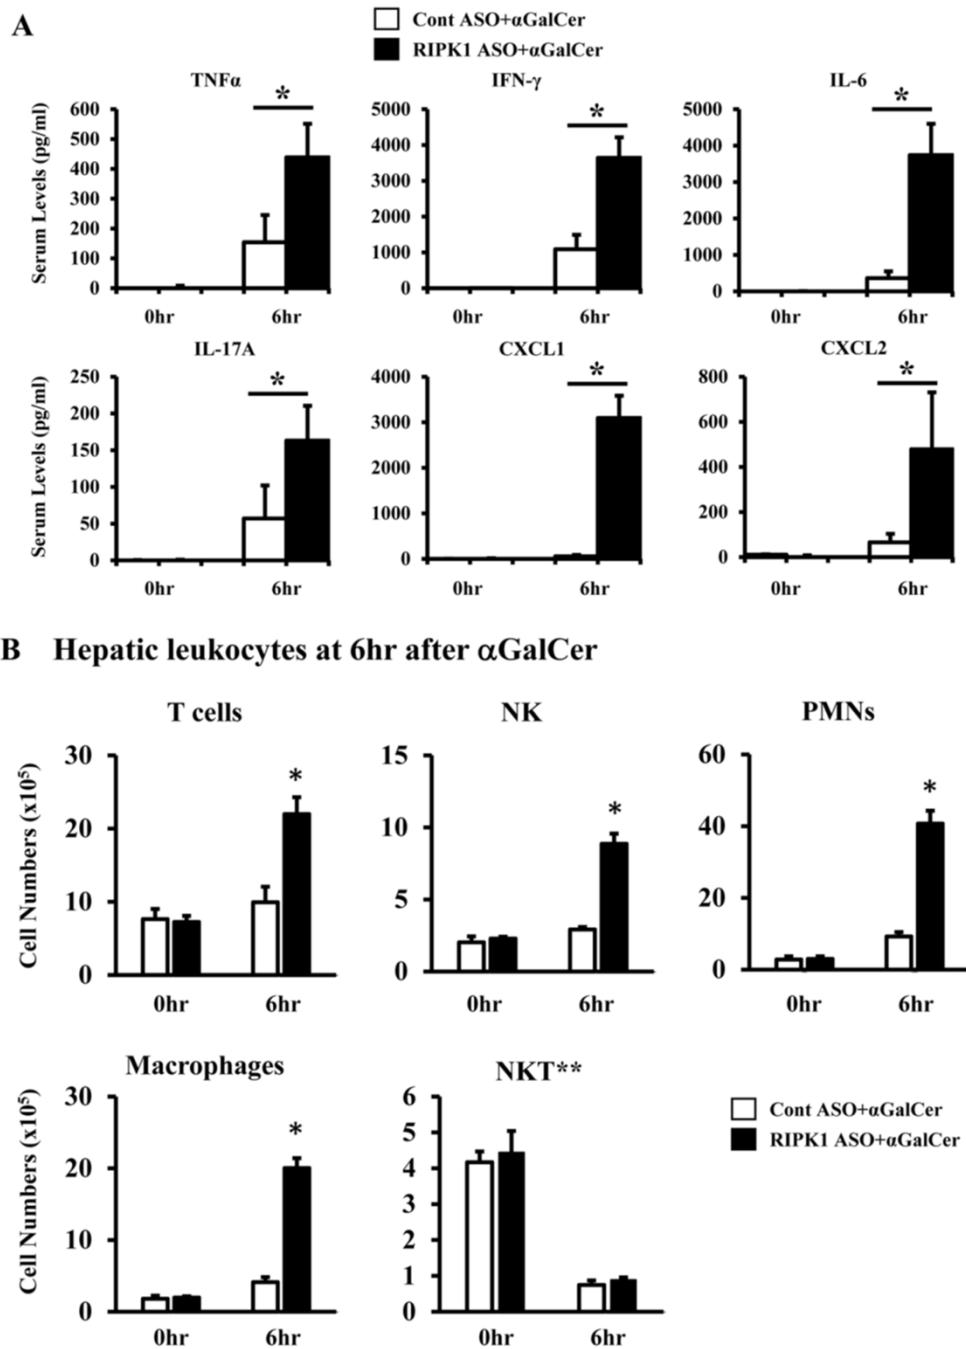

**Suppl. Figure 1.** Knockdown of RIPK1 significantly increases the serum levels of cytokines/chemokines (**A**) and hepatic leukocytes (**B**) in response to αGalCer treatment. Groups of mice were pretreated with Cont ASO or RIPK1 ASO to silence RIPK1 prior to αGalCer (4μg/mouse, i.p.). (**A**) Serum cytokine/chemokine levels at 6hr after αGalCer (n=4-6). \*p<0.05 vs. Cont ASO; (**B**) Total numbers of hepatic leukocytes per liver tissue at 6hr after αGalCer. \*p<0.05 vs. Cont ASO. \*\*Reduced NKT numbers in both groups reflected an activation-induced cell death of NKT cells in response to αGalCer as expected.

## Suppl. Figure 2

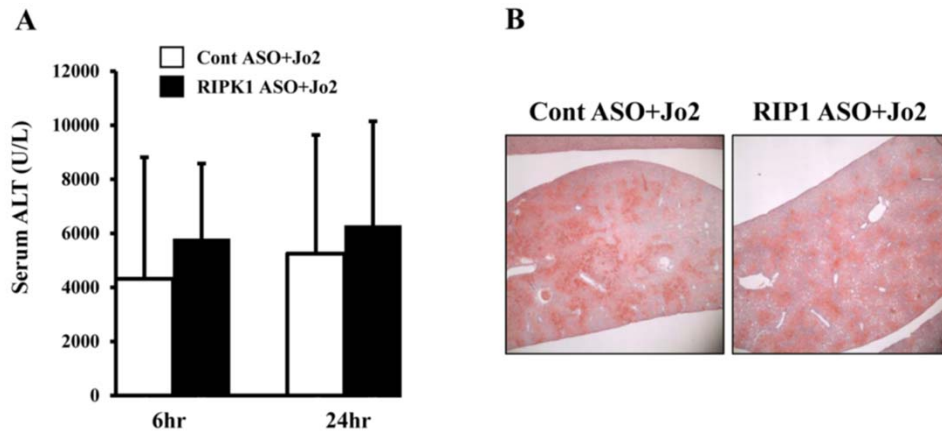

**Suppl. Figure 2.** RIPK1 knockdown does not sensitize to Fas-mediated liver injury. Groups of Cont ASO and RIPK1 ASO pretreated mice (n=5 per group) were administered i.p with anti-Fas (Jo2, 4 $\mu$ g per mouse). **(A)** Serum ALT at 6 and 24hr after Jo2; **(B)** H&E staining of liver sections at 24hr after Jo2.

### Suppl. Figure 3

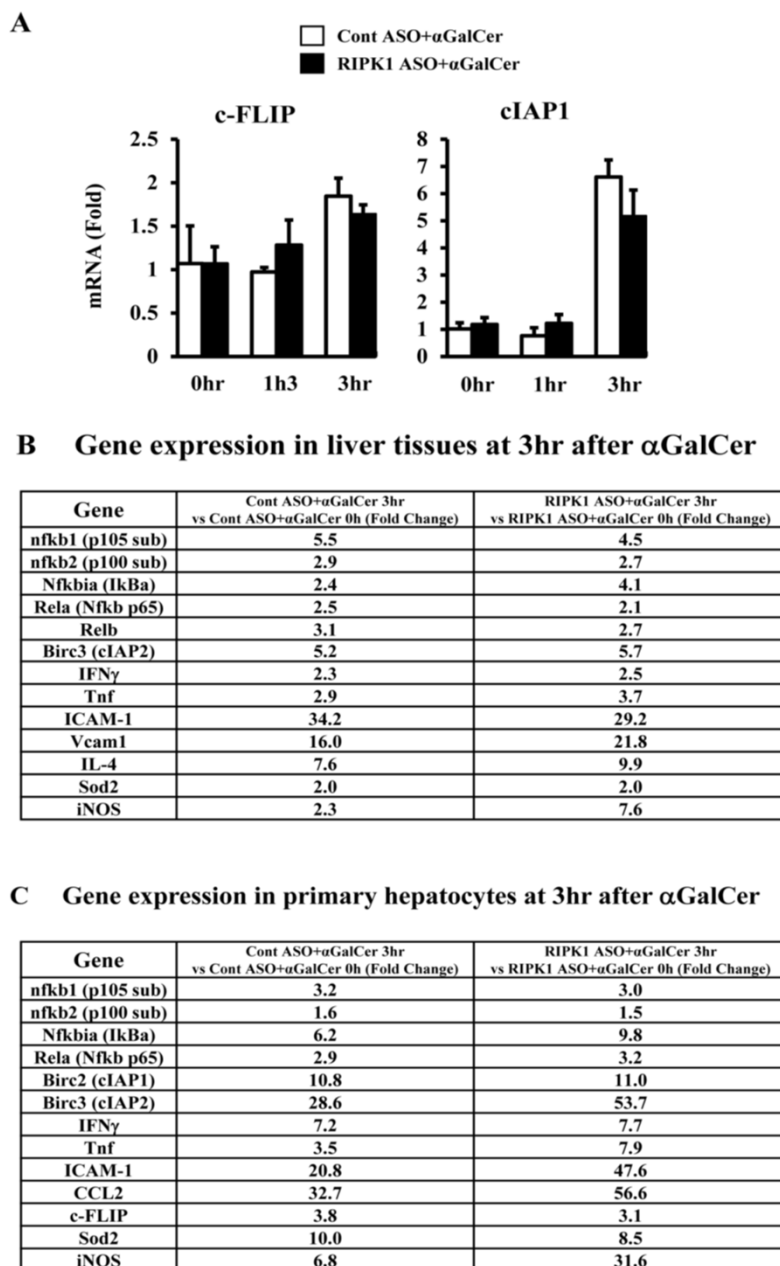

**Suppl. Figure 3.** Knockdown of RIPK1 does not impair the induction of NF-κB downstream genes. **(A)** qPCR analysis of mRNA levels of c-FLIP and cIAP1 in the liver from Cont ASO and RIPK1 ASO treated mice at indicated times after αGalCer treatment. **(B)** mRNA levels in the liver tissues from Cont ASO and RIPK1 ASO treated mice at 3hr after αGalCer treatment were analyzed by mouse NF-κB Signaling Pathway RT<sup>2</sup> Profiler<sup>TM</sup> PCR array kit (QIAGEN). Fold changes at 3hr over time zero were expressed. **(C)** mRNA levels in the primary hepatocytes isolated from Cont ASO and RIPK1 ASO treated mice at 3hr after αGalCer treatment were analyzed by mouse NF-κB Signaling Pathway RT<sup>2</sup> Profiler<sup>TM</sup> PCR array kit (QIAGEN). Fold changes at 3hr over time zero were expressed.

## Suppl. Figure 4

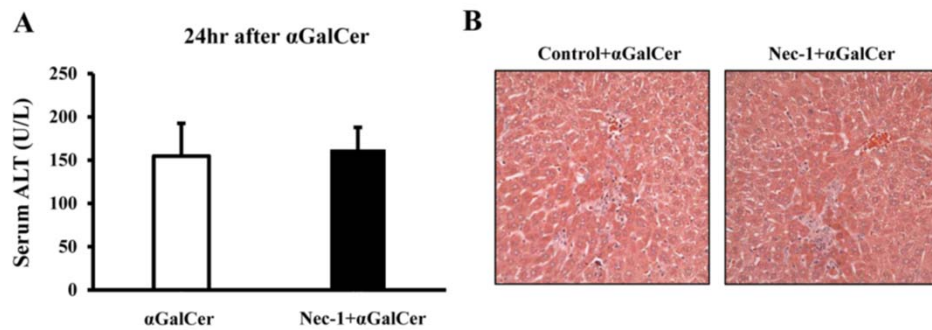

**Suppl. Figure 4.** Necostatin-1 (Nec-1) does not prevent  $\alpha$ GalCer-mediated liver injury. Groups of mice were pretreated with inactive Nec-1 or Nec-1 (1.65 mg/kg, i.p.) 15min prior to  $\alpha$ GalCer (4 $\mu$ g per mouse, i.p.). **(A)** Serum ALT at 24hr after  $\alpha$ GalCer (n=5 per group),  $p>0.05$ ; **(B)** H&E staining of liver sections at 24hr after  $\alpha$ GalCer.
